# Supplementary material for: Optimizing a Male Reproductive Aging Mouse Model by d-Galactose Injection
Source: PubMed Central journal article supplement (PMC4730340; doi:10.3390/ijms17010098), 2016-01-13
Supplement: ijms-17-00098-s001.pdf [file ijms-17-00098-s001.pdf]

# Supplementary Information: Optimizing a Male Reproductive Aging Mouse Model by D-Galactose Injection

Chun-Hou Liao, Bing-Huei Chen, Han-Sun Chiang, Chiu-Wei Chen, Mei-Feng Chen, Chih-Chun Ke, Ya-Yun Wang, Wei-Ning Lin, Chi-Chung Wang and Ying-Hung Lin

**Table S1.** List of expressional changes of up-regulated and down-regulated genes from D-gal-injected mice.

| Gene               | Full Name                                                                                         | Fold |
|--------------------|---------------------------------------------------------------------------------------------------|------|
| Up-regulated genes |                                                                                                   |      |
| <i>Gpx3</i>        | Glutathione peroxidase 3                                                                          | 13.1 |
| <i>C3</i>          | Complement component 3                                                                            | 8.5  |
| <i>H2-Aa</i>       | Histocompatibility 2, class II antigen A, $\alpha$                                                | 6.9  |
| <i>Ctss</i>        | Cathepsin S                                                                                       | 6.3  |
| <i>Cylc2</i>       | Cylicin, basic protein of sperm head cytoskeleton 2                                               | 5.6  |
| <i>H2-Eb1</i>      | Histocompatibility 2, class II antigen E $\beta$                                                  | 5.2  |
| <i>Psmb7</i>       | Proteasome (prosome, macropain) subunit, $\beta$ type 7                                           | 4.3  |
| <i>Frg1</i>        | FSHD region gene 1                                                                                | 4.2  |
| <i>Safb2</i>       | Scaffold attachment factor B2                                                                     | 4.1  |
| <i>Gbp2</i>        | Guanylate binding protein 2                                                                       | 4    |
| <i>B2m</i>         | $\beta$ -2 microglobulin                                                                          | 4    |
| <i>Tbx3</i>        | T-box 3                                                                                           | 3.8  |
| <i>Snrpa</i>       | Small nuclear ribonucleoprotein polypeptide A                                                     | 3.7  |
| <i>Smarca2</i>     | SWI/SNF related, matrix associated, actin dependent regulator of Chromatin, subfamily a, member 2 | 3.7  |
| <i>Gm13237</i>     | Predicted gene 13237                                                                              | 3.6  |
| <i>Cep85l</i>      | Centrosomal protein 85-like                                                                       | 3.5  |
| <i>Dcn</i>         | Decorin                                                                                           | 3.2  |
| <i>Nme8</i>        | NME/NM23 family member 8                                                                          | 3.2  |
| <i>Dhx9</i>        | DEAH (Asp-Glu-Ala-His) box polypeptide 9                                                          | 3.2  |
| <i>Dnajb11</i>     | DnaJ (Hsp40) homolog, subfamily B, member 11                                                      | 3.2  |
| <i>Sltm</i>        | SAFB-like, transcription modulator                                                                | 3.1  |
| <i>Fus</i>         | Fused in sarcoma                                                                                  | 3.1  |
| <i>Anxa1</i>       | Annexin A1                                                                                        | 3.1  |
| <i>Ly86</i>        | Lymphocyte antigen 86                                                                             | 3    |
| <i>Hpgd</i>        | Hydroxyprostaglandin dehydrogenase 15 (NAD)                                                       | 3    |
| <i>Ccdc112</i>     | Coiled-coil domain containing 112                                                                 | 3    |
| <i>Efcab2</i>      | EF-hand calcium binding domain 2                                                                  | 3    |
| <i>C1qc</i>        | Complement component 1, q subcomponent, C chain                                                   | 3    |
| <i>Dnajc21</i>     | DnaJ (Hsp40) homolog, subfamily C, member 21                                                      | 2.9  |
| <i>Ccl8</i>        | Chemokine (C-C motif) ligand 8                                                                    | 2.9  |
| <i>Ccdc186</i>     | Coiled-coil domain containing 186                                                                 | 2.9  |
| <i>Plagl1</i>      | Pleomorphic adenoma gene-like 1                                                                   | 2.8  |
| <i>Amy1</i>        | Amylase 1, salivary                                                                               | 2.8  |
| <i>Cdkl2</i>       | Cyclin-dependent kinase-like 2 (CDC2-related kinase)                                              | 2.8  |
| <i>Nucb2</i>       | Nucleobindin 2                                                                                    | 2.8  |
| <i>Ifitm2</i>      | Interferon induced transmembrane protein 2                                                        | 2.8  |

Table S1. Cont.

| Gene             | Full Name                                                                                 | Fold |
|------------------|-------------------------------------------------------------------------------------------|------|
| <i>Dock8</i>     | Dedicator of cytokinesis 8                                                                | 2.8  |
| <i>Slc24a5</i>   | Solute carrier family 24, member 5                                                        | 2.7  |
| <i>Fam98b</i>    | Family with sequence similarity 98, member B                                              | 2.7  |
| <i>Gstm2</i>     | Glutathione S-transferase, mu 2                                                           | 2.7  |
| <i>Stx4a</i>     | Syntaxin 4A (placental)                                                                   | 2.7  |
| <i>Ik</i>        | IK cytokine                                                                               | 2.7  |
| <i>Mki67</i>     | Antigen identified by monoclonal antibody Ki 67                                           | 2.7  |
| <i>Nsmce2</i>    | Non-SMC element 2 homolog (MMS21, <i>S. cerevisiae</i> )                                  | 2.6  |
| <i>Efemp1</i>    | Epidermal growth factor-containing fibulin-like extracellular Matrix protein 1            | 2.6  |
| <i>Dnajc2</i>    | DnaJ (Hsp40) homolog, subfamily C, member 2                                               | 2.6  |
| <i>Snrnp70</i>   | Small nuclear ribonucleoprotein 70 (U1)                                                   | 2.6  |
| <i>Wfdc17</i>    | WAP four-disulfide core domain 17                                                         | 2.5  |
| <i>Hpgd</i>      | Hydroxyprostaglandin dehydrogenase 15 (NAD)                                               | 2.5  |
| <i>Leo1</i>      | Leo1, Paf1/RNA polymerase II complex component, homolog                                   | 2.5  |
| <i>Cenpe</i>     | Centromere protein E                                                                      | 2.5  |
| <i>Fam71d</i>    | Family with sequence similarity 71, member D                                              | 2.5  |
| <i>Zmynd11</i>   | Zinc finger, MYND domain containing 11                                                    | 2.5  |
| <i>Zfml</i>      | Zinc finger, matrin-like                                                                  | 2.5  |
| <i>Sult1e1</i>   | Sulfotransferase family 1E, member 1                                                      | 2.4  |
| <i>Irf7</i>      | Interferon regulatory factor 7                                                            | 2.4  |
| <i>C1ra C1rb</i> | Complement component 1, r subcomponent A   complement Component 1, r subcomponent B       | 2.4  |
| <i>Ccdc104</i>   | Coiled-coil domain containing 104                                                         | 2.4  |
| <i>Wdr66</i>     | WD repeat domain 66                                                                       | 2.4  |
| <i>Nae1</i>      | NEDD8 activating enzyme E1 subunit 1                                                      | 2.4  |
| <i>Col4a3bp</i>  | Collagen, type IV, $\alpha$ 3 (Goodpasture antigen) binding protein                       | 2.4  |
| <i>Hk1</i>       | Hexokinase 1                                                                              | 2.4  |
| <i>Phyh</i>      | Phytanoyl-CoA hydroxylase                                                                 | 2.4  |
| <i>Gm136</i>     | Predicted gene 136                                                                        | 2.4  |
| <i>Hey1</i>      | Hairy/enhancer-of-split related with YRPW motif 1                                         | 2.4  |
| <i>Ccdc66</i>    | Coiled-coil domain containing 66                                                          | 2.4  |
| <i>Aldh1a7</i>   | Aldehyde dehydrogenase family 1, subfamily A7                                             | 2.4  |
| <i>Nemf</i>      | Nuclear export mediator factor                                                            | 2.4  |
| <i>Hsd3b1</i>    | Hydroxy- $\delta$ -5-steroid dehydrogenase, 3 $\beta$ - and steroid $\delta$ -isomerase 1 | 2.4  |
| <i>Hirip3</i>    | HIRA interacting protein 3                                                                | 2.3  |
| <i>Ncl</i>       | Nucleolin                                                                                 | 2.3  |
| <i>Tmem176b</i>  | Transmembrane protein 176B                                                                | 2.3  |
| <i>Wasf2</i>     | WAS protein family, member 2                                                              | 2.3  |
| <i>Fxr1</i>      | Fragile X mental retardation gene 1, autosomal homolog                                    | 2.3  |
| <i>Gpatch4</i>   | G patch domain containing 4                                                               | 2.3  |
| <i>Gucy1a3</i>   | Guanylate cyclase 1, soluble, $\alpha$ 3                                                  | 2.3  |
| <i>Ino80b</i>    | INO80 complex subunit B                                                                   | 2.3  |
| <i>Cdk11b</i>    | Cyclin-dependent kinase 11B                                                               | 2.3  |
| <i>Morf4l2</i>   | Mortality factor 4 like 2   mortality factor 4-like protein 2-like                        | 2.3  |
| <i>Serpinf1</i>  | Serine (or cysteine) peptidase inhibitor, clade F, member 1                               | 2.3  |
| <i>Top2a</i>     | Topoisomerase (DNA) II $\alpha$                                                           | 2.3  |

Table S1. Cont.

| Gene            | Full Name                                                                        | Fold |
|-----------------|----------------------------------------------------------------------------------|------|
| <i>Nipbl</i>    | Nipped-B homolog ( <i>Drosophila</i> )                                           | 2.3  |
| <i>Gm4907</i>   | Predicted gene 4907                                                              | 2.3  |
| <i>Ankrd36</i>  | Ankyrin repeat domain 36                                                         | 2.3  |
| <i>Pltp</i>     | Phospholipid transfer protein                                                    | 2.2  |
| <i>Igf2bp2</i>  | Insulin-like growth factor 2 mRNA binding protein 2                              | 2.2  |
| <i>Senp5</i>    | SUMO/sentrin specific peptidase 5                                                | 2.2  |
| <i>Plcb1</i>    | Phospholipase C, $\beta$ 1                                                       | 2.2  |
| <i>Dcn</i>      | Decorin                                                                          | 2.2  |
| <i>Sumo1</i>    | Small ubiquitin-like modifier 1                                                  | 2.2  |
| <i>Dnttip2</i>  | Deoxynucleotidyltransferase, terminal, interacting protein 2                     | 2.2  |
| <i>Zrsr1</i>    | Zinc finger (CCCH type), RNA binding motif and serine/arginine rich 1            | 2.2  |
| <i>Utp3</i>     | UTP3, small subunit (SSU) processome component, homolog ( <i>S. cerevisiae</i> ) | 2.2  |
| <i>Cabyr</i>    | Calcium-binding tyrosine-(Y)-phosphorylation regulated (fibrousheathin 2)        | 2.2  |
| <i>Anp32e</i>   | Acidic (leucine-rich) nuclear phosphoprotein 32 family, member E                 | 2.2  |
| <i>Pinx1</i>    | PIN2/TERF1 interacting, telomerase inhibitor 1                                   | 2.2  |
| <i>Epsti1</i>   | Epithelial stromal interaction 1 (breast)                                        | 2.2  |
| <i>Nop56</i>    | NOP56 ribonucleoprotein                                                          | 2.2  |
| <i>Ndc80</i>    | NDC80 homolog, kinetochore complex component ( <i>S. cerevisiae</i> )            | 2.2  |
| <i>Smim24</i>   | Small integral membrane protein 24                                               | 2.2  |
| <i>Ccdc173</i>  | Coiled-coil domain containing 173                                                | 2.2  |
| <i>Hnrnpul2</i> | Heterogeneous nuclear ribonucleoprotein U-like 2                                 | 2.2  |
| <i>Acsl4</i>    | Acyl-CoA synthetase long-chain family member 4                                   | 2.1  |
| <i>Aggf1</i>    | Angiogenic factor with G patch and FHA domains 1                                 | 2.1  |
| <i>Zpbp2</i>    | Zona pellucida binding protein 2                                                 | 2.1  |
| <i>F13a1</i>    | Coagulation factor XIII, A1 subunit                                              | 2.1  |
| <i>Atg3</i>     | Autophagy related 3                                                              | 2.1  |
| <i>Fhad1</i>    | Forkhead-associated (FHA) phosphopeptide binding domain 1                        | 2.1  |
| <i>Tns1</i>     | Tensin 1                                                                         | 2.1  |
| <i>Senp2</i>    | SUMO/sentrin specific peptidase 2                                                | 2.1  |
| <i>Mapk1ip1</i> | Mitogen-activated protein kinase 1 interacting protein 1                         | 2.1  |
| <i>Grk1</i>     | G protein-coupled receptor kinase 1                                              | 2.1  |
| <i>Wdr43</i>    | WD repeat domain 43                                                              | 2.1  |
| <i>Kank2</i>    | KN motif and ankyrin repeat domains 2                                            | 2.1  |
| <i>Rrbp1</i>    | Ribosome binding protein 1                                                       | 2.1  |
| <i>Terf1</i>    | Telomeric repeat binding factor 1                                                | 2.1  |
| <i>Rdx</i>      | Radixin                                                                          | 2.1  |
| <i>Sult1a1</i>  | Sulfotransferase family 1A, phenol-preferring, member 1                          | 2.1  |
| <i>Pdgfra</i>   | Platelet derived growth factor receptor, $\alpha$ polypeptide                    | 2.1  |
| <i>Csnka2ip</i> | Casein kinase 2, $\alpha$ prime interacting protein                              | 2.1  |
| <i>Snrnp48</i>  | Small nuclear ribonucleoprotein 48 (U11/U12)                                     | 2.1  |
| <i>Wdr26</i>    | WD repeat domain 26                                                              | 2    |
| <i>Tmco5</i>    | Transmembrane and coiled-coil domains 5                                          | 2    |
| <i>Suco</i>     | SUN domain containing ossification factor                                        | 2    |
| <i>Polr3gl</i>  | Polymerase (RNA) III (DNA directed) polypeptide G like                           | 2    |
| <i>Ddr2</i>     | Discoidin domain receptor family, member 2                                       | 2    |

Table S1. Cont.

| Gene                 | Full Name                                                    | Fold |
|----------------------|--------------------------------------------------------------|------|
| <i>Speer2</i>        | Spermatogenesis associated glutamate (E)-rich protein 2      | 2    |
| <i>Rwdd1</i>         | RWD domain containing 1                                      | 2    |
| <i>Tshz2</i>         | Teashirt zinc finger family member 2                         | 2    |
| Down-regulated genes |                                                              |      |
| Gene_symbol          | Description                                                  | Fold |
| <i>Rn28s1</i>        | 28S ribosomal RNA                                            | 0.28 |
| <i>Snord13</i>       | Small nucleolar RNA, C/D box 13                              | 0.32 |
| <i>Snord118</i>      | Small nucleolar RNA, C/D box 118                             | 0.36 |
| <i>2900060B14Rik</i> | RIKEN cDNA 2900060B14 gene                                   | 0.37 |
| <i>Rs5-8s1</i>       | 5.8S ribosomal RNA                                           | 0.37 |
| <i>Rn18s</i>         | 18S ribosomal RNA                                            | 0.38 |
| <i>Rn7sk</i>         | RNA, 7SK, nuclear                                            | 0.41 |
| <i>Cyp4f39</i>       | Cytochrome P450, family 4, subfamily f, polypeptide 39       | 0.45 |
| <i>Lbr</i>           | Lamin B receptor                                             | 0.45 |
| <i>Comp</i>          | Cartilage oligomeric matrix protein                          | 0.46 |
| <i>Npas1</i>         | Neuronal PAS domain protein 1                                | 0.46 |
| <i>Pomc</i>          | Pro-opiomelanocortin- $\alpha$                               | 0.47 |
| <i>Pfn1</i>          | Profilin 1                                                   | 0.47 |
| <i>Zdhhc1</i>        | Zinc finger, DHHC domain containing 1                        | 0.48 |
| <i>Lrrc29</i>        | Leucine rich repeat containing 29                            | 0.48 |
| <i>Katnb1</i>        | Katanin p80 (WD40-containing) subunit B 1                    | 0.48 |
| <i>Nek8</i>          | NIMA (never in mitosis gene a)-related expressed kinase 8    | 0.49 |
| <i>Mau2</i>          | MAU2 chromatid cohesion factor homolog ( <i>C. elegans</i> ) | 0.49 |
| <i>Sec1</i>          | Secretory blood group 1                                      | 0.49 |
| <i>Cnnm4</i>         | Cyclin M4                                                    | 0.49 |

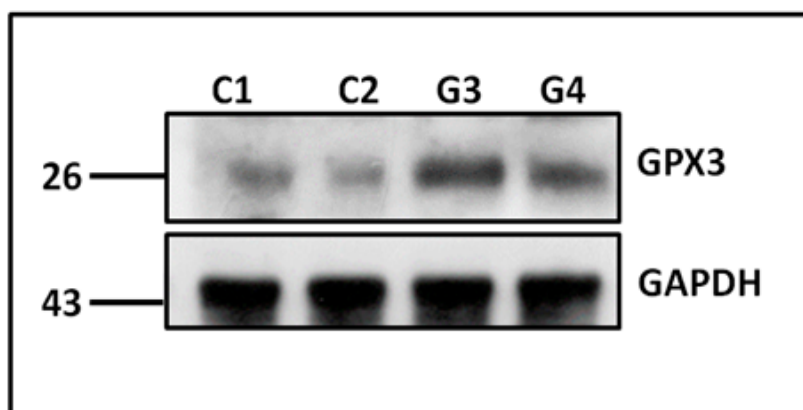

**Figure S1.** The expressional levels of GPX3 in testis from D-gal injection and control mice. Western blot analysis of testis by D-galactose injection (G3 and G4) and controls (C1 and C2) using an anti-GPX3 and an anti-GAPDH antibody.
